1 **Pattern and contrast dependent visual response in the box jellyfish *Tripedalia***

2 *cystophora*

3

4 Garm, A.<sup>1</sup> and Hedal, I.<sup>1</sup>, Islin, M.<sup>1</sup> and Gurska, D.<sup>1</sup>

5

6

7 <sup>1</sup> Section of Marine Biology, University of Copenhagen, Denmark

8

9 Corresponding author:

10 Anders Garm

11 Section of Marine Biology, Department of Biology

12 University of Copenhagen

13 Universitetsparken 4

14 2100 Copenhagen Ø

15 Denmark

16 Office phone +45 51827004

17 Mail: [algarm@bio.ku.dk](mailto:algarm@bio.ku.dk)

18

19 Keywords: cubomedusae, vision, eyes, behaviour, spatial resolution

20

21 Running title: Spatial vision in box jellyfish

22

23 **Abstract**

24

25 Cubomedusae possess a total of 24 eyes of which some are structurally similar to  
26 vertebrate eyes. Accordingly, the medusae also display a range of light guided  
27 behaviours including obstacle avoidance, diurnal activity patterns, and navigation.  
28 Navigation is supported by spatial resolution and image formation in the so-called  
29 upper lens eye. Further, there are indications that the obstacle avoidance requires  
30 image information from the lower lens eye. Here we use a behavioural assay to  
31 examine the obstacle avoidance behaviour of the Caribbean cubomedusa *Tripedalia*  
32 *cystophora* and test whether it requires spatial resolution. The possible influence of  
33 the contrast and orientation of the obstacles is also examined. We show that the  
34 medusae can only perform the behaviour when spatial information is present, and fail  
35 to avoid a uniformly dark wall, directly proving the use of spatial vision. We also  
36 show that the medusae respond stronger to high contrast lines than to low contrast  
37 lines in a graded fashion and propose that the medusae use the contrast as a semi  
38 reliable measure of distance to the obstacle.

39

## 40 **Introduction**

41

42 Eyes come in a great variety of shapes and sizes and are used for an impressive range  
43 of light guided behaviours from simple light detection to highly advanced  
44 intraspecific communication (Land and Nilsson, 2012). A normal assumption is that  
45 the degree of complexity found in the eyes and the behaviour they support is closely  
46 correlated with the brainpower of the organism. It has been considered an enigma,  
47 therefore, that cubomedusae, or box jellyfish, possess very elaborate visual equipment  
48 (Wehner, 2005). All known species of box jellyfish have the same overall  
49 arrangement of the eyes. They have four sensory structures called rhopalia situated in  
50 rhopalial niches along the lower part of the bell and each of them carries six eyes of  
51 four distinct morphological types (Hertwig and Hertwig, 1878; Claus, 1878; Berger,  
52 1898; Werner, 1975; Yamasu and Yoshida, 1976; Martin, 2004). There is an upper  
53 and a lower lens eye, a pair of pit and a pair of slit eyes. The lens eyes are structurally  
54 similar to vertebrate and cephalopod eyes in that they have a spherical lens with a  
55 graded refractive index, an upright hemisphere shaped retina, a cornea, a vitreous  
56 space and in the case of the lower lens eye, a movable iris (Nilsson et al., 2005).

57         Box jellyfish also display a more diverse behavioural repertoire than any other  
58 known cnidarian and several of them are light guided (Garm and Ekström, 2010).  
59 Here it should be kept in mind that almost all the behavioural data stem from a single  
60 species of box jellyfish, *Tripedalia cystophora* from the Caribbean, and thus many  
61 more behaviours are bound to surface when more species are examined. *T. cystophora*  
62 is found between the prop roots of mangrove trees where they prey on a single species  
63 of copepod gathering in light shafts between the roots (Stewart, 1996). The medusae  
64 use their eyes to seek out the light shafts where they passively hunt (Buskey, 2003).

65 They rest on the bottom of the mangrove lagoon at night (Garm et al., 2012). Every  
66 morning they have to navigate back to their habitat between the roots and this they do  
67 by visually detecting the mangrove canopy through the water surface (Garm et al.,  
68 2011). The medusae are also able to detect and avoid obstacles in their surroundings  
69 (like the prop roots) and for this they probably use their lower lens eye (Garm et al.,  
70 2007b).

71 The morphological and optical data indicate that both lens eyes are image  
72 forming with a spatial resolution in the range of 10-20 degrees (Nilsson et al., 2005).  
73 In the case of the upper lens eye the use of spatial information is confirmed by the  
74 navigation behaviour, where they see the direction to the canopy (Garm et al., 2011).  
75 The obstacle avoidance behaviour also indicated the use of spatial information and  
76 true image formation, in that its onset was correlated with the size of the obstacle on  
77 the retina (Garm et al., 2007b). Still, since the obstacles were dark on a bright  
78 background the behaviour could also be triggered by a directional drop in light  
79 intensity when approaching the obstacles and thus be part of a simpler positive  
80 phototaxis.

81 Here we have examined the obstacle avoidance behaviour of *T. cystophora*  
82 and tested whether an image of the obstacle is needed to accomplish this behaviour or  
83 whether it is a case of positive phototaxis. In a behavioural assay the medusae were  
84 presented with a visual scene of either alternating dark and bright stripes in different  
85 orientations or an uniformly grey wall. We hypothesized that the medusae would only  
86 be able to avoid the striped walls and not the uniform walls without contrast. Further,  
87 we hypothesized that vertical stripes with high contrast would evoke the strongest  
88 response, since they would be the most visible and have the most resemblance with  
89 the natural obstacles, the prop roots.

90

## 91 **Material and Methods**

92

### 93 Animals

94 We used adult sized animals (7-9 mm in bell diameter) from our cultures at the  
95 University of Copenhagen. The animals were cultured in 250 l tanks with recycled sea  
96 water at 28°C and psu = 30. In the culture tanks the light:dark cycle was 8:16 hours  
97 and the medusae reached adult size in about 2 month. A total of 36 medusae were  
98 used and each medusa was only used in one assay.

99

### 100 Behavioural arena

101 The experiments were conducted in a round 3 liter tank with a diameter of 16 cm. The  
102 tank was filled with water from the culture tank to minimize stress, which can be  
103 induced by moving the animals to water with changes in salinity and/or chemical  
104 composition. The water depth was approximately 12 cm and the water was kept at  
105 28°C by placing the tank on a heating plate. The wall of the tank had a changeable  
106 visual scene of either 2 cm wide grey and white stripes or uniformly grey. Undiffused  
107 light came from a 11W fluorescent blub (OSRAM longlife, OSRAM GmbH,  
108 Augsburg, Germany) situated approx. 50 cm above the center of the tank thereby  
109 creating an even illumination of the behavioural arena. The light intensity measured at  
110 the surface straight under the lamp was 76 W/m<sup>2</sup>.

111 In the case of the stripes (contrast and orientation experiments) three different  
112 orientations were used: vertical, 45° oblique and horizontal. All three orientations  
113 were tested with five different grey tones resulting in contrasts of 0.93, 0.71, 0.39,  
114 0.27, and 0.17. The contrast was calculated as  $(I_w - I_g)/(I_w + I_g)$  where  $I_g$  is the intensity

115 of reflected light from the grey strips and  $I_w$  the intensity reflected from the white  
116 stripes both corrected by the absorption spectrum of the 500 nm opsin (Govardovskii  
117 et al., 2000) present in the lower lens eye (Coates et al., 2006; Garm et al., 2007a).  
118 The intensities were measured from 350 nm to 700 nm using a  
119 radiospectrophotometer (ILT900W, International Light Technologies Inc., Peabody,  
120 MA) with the sensor held perpendicular to the wall at a distance of 1 cm and 1 cm  
121 below the surface.

122         With the uniformly dark walls (intensity experiments) five different grey tones  
123 were used one at a time. The grey tones were chosen to match the mean intensities of  
124 the white stripe and the five different grey stripes respectively (with an accuracy of  
125 +/- 5%), such that the intensity of the reflected light of the darkest uniformly grey  
126 wall matched the mean of reflected light of the white and the darkest grey stripe.  
127 Light intensities were measured as for the contrast experiments.

128

#### 129 Behavioural protocol

130 At the onset of each behavioural assay a medusa was placed in the center of the arena  
131 and left to adjust for 5 min, after which they had re-extended their tentacles and swam  
132 with normal pulse rate. After this acclimation each medusa was tested with either five  
133 striped walls with the same orientation but varying contrast (contrast and orientation  
134 experiments) or the five uniformly dark walls (intensity experiments). The visual  
135 scene was changed every 4 min and the order of contrast/darkness was randomized.  
136 The experimental series (acclimation plus 5 tests) lasted 25 min and was repeated  
137 eight times using eight different experimental animals in the case of vertical stripes  
138 and uniform grey tones. The experiments with oblique and horizontal stripes were  
139 repeated ten times using ten medusae. The swim pattern during the last 2.5 min with

140 each visual scene was recorded from above using a video camera (Sony handycam  
141 DCR-HC40, Sony Corp., Tokyo, Japan). The timing equals earlier experiments (Garm  
142 et al., 2007b).

143

#### 144 Data analysis

145 The video recordings were turned into swim trajectories with a temporal resolution of  
146 1 s using a custom made program for Matlab 2011a (MathWorks Inc., Natick, MA).

147 From the trajectories the average distance to the wall was calculated. A temporal  
148 resolution of 0.5 s was also tested for three recordings to make sure the sampling rate  
149 was sufficient to resolve the swim pattern and no difference was found. The number  
150 of avoidance responses for each individual and each visual scene was counted

151 manually and the distance to the wall at the behavioural onset was determined for  
152 each avoidance response. An avoidance response is defined as the medusa swimming  
153 towards the wall and then turning a minimum of 120° in 2-3 swim contractions with  
154 an increased pulse rate (see supplementary materials, video 1, for example). Finally,  
155 in the contrast experiments the distance of the avoidance response (when the medusa  
156 started turning) was turned into visual angle of the stripes following the equation  $\tan$

157  $\frac{1}{2}\alpha = a/b$ , where  $\alpha$  is the visual angle,  $a$  the width of the stripe (2 cm), and  $b$  the

158 distance of avoidance. All statistical tests were performed in Biostat 2008

159 Professional (version 5.4.0.0, AnalystSoft, Vancouver, Canada) and were one-way

160 ANOVAs followed by Tukey-Kramer post hoc test unless otherwise stated. Fishers

161 LSD post hoc test was used in cases of uneven variances (distance when avoidance  
162 and visual angle when avoidance).

163

#### 164 Contrasts in the habitat

165 As it was not possible to make light intensity measurements from small confined areas  
166 in the mangrove habitat of the medusae, we used an indirect approach. Pictures of the  
167 mangrove habitat in Puerto Rico including several prop roots and medusae were taken  
168 at noon with a standard underwater camera. A representative of these RGB pictures  
169 showing the typical habitat was chosen. The red channel was removed from the  
170 picture using the program Corel PhotoPaint (version X3, Corel Corporation, Canada)  
171 to better match the spectral sensitivity of the medusae and it was turned into 8 bit grey  
172 scale. The average pixel value (0 = black, 255 = white) was then determined from a  
173 rectangular area (500 pixels) of a prop root and from the neighboring area in the  
174 water. These pixel values were used as relative estimates of the light intensity and the  
175 contrast between the root and water was calculated in the following way:  $(PV_w -$   
176  $PV_r)/(PV_w + PV_r)$ , where  $PV_w$  = pixel value from the water and  $PV_r$  = pixel value from  
177 the root. The procedure was repeated for 4 roots at different distances to the camera.  
178 The absolute distances were not measured but the relative distance was determined by  
179 where in the picture the root intersected the water surface.

180

## 181 **Results**

182

### 183 Contrast experiments

184 In the experiments using grey and white stripes the medusae performed many clear  
185 obstacle avoidances. With increasing contrast (c) from 0.17 to 0.93 the medusae  
186 responded with a stronger obstacle avoidance response for all three orientations of the  
187 stripes. In the swim trajectories it is seen that medusae made only few turns and came  
188 close to the wall when contrast was low (figs. 1-3). At  $c = 0.93$  the medusae



189 frequently turned and stayed centered in the tank (figs. 1-3). This is in contrast to the  
190 results from the intensity experiments with the uniform grey walls (fig. 4).

191 The behavioural change with contrast is confirmed when the average distance  
192 to the wall is calculated (fig. 5a). With the vertical stripes and the lowest contrast the  
193 medusae had an average distance of 2.5 cm to the wall whereas when  $c = 0.93$  the  
194 average distance was 5.7 cm (all behavioural data are summarized in table 1). These  
195 differences are significant between a given contrast level and all other except the  
196 neighboring levels (one-way ANOVA,  $F_{4, 35}=15.1$ ,  $p<0.0001$ , followed by Tukey-  
197 Kramer post hoc,  $0.0001<p<0.0071$ ). The results are the same for the oblique stripes  
198 except here there is also a significant difference between  $c=0.39$  and  $c=0.71$  (one-way  
199 ANOVA,  $F_{4, 45}=49.2$ ,  $0.001<p<0.016$ ). With the horizontal stripes there were no  
200 differences in the average distance to the wall between the four lowest contrasts but  
201 they stayed significantly farther away from the darkest stripes than the four others  
202 (one-way ANOVA,  $F_{4, 45}=12.6$ ,  $0.0001<p<0.0003$ ).

203 The medusae not only stayed farther away from the wall of the tank they also  
204 performed more obstacle avoidances per min with higher contrast (fig. 5b, table 1).  
205 The highest rate, 3.3 min<sup>-1</sup>, was obtained with the vertical stripes and  $c=0.93$ . This  
206 was significantly higher than the rates with vertical stripes at  $c=0.17$ , 0.27 and 0.39  
207 (one-way ANOVA,  $F_{4, 35}=11.7$ ,  $0.0001<p<0.0002$ ) and  $c=0.71$  also resulted in  
208 significantly more avoidances than  $c=0.17$  ( $p=0.011$ ). With the oblique stripes there  
209 was also an increase with contrast (fig. 5b) and here all differences were significant  
210 (one-way ANOVA,  $F_{4, 44}=61.3$ ,  $0.0001<p<0.044$ ) except between  $c=0.17$  and  $c=0.25$   
211 ( $p=1$ ). In the experiments with horizontal stripes only  $c=0.93$  produced significantly  
212 more avoidances than the four other contrasts (one-way ANOVA,  $F_{4, 45}=16.2$ ,  
213  $0.0001<p<0.0002$ ).

214 The increasing number of avoidances with higher contrast stripes was also  
215 performed at a longer distance from the stripes (fig. 6a, table 1). On average the  
216 obstacle avoidance responses were performed 2.2 cm from the wall with vertical  
217 stripes at  $c = 0.17$  but 4.6 cm from the wall at  $c = 0.93$ . The differences are significant  
218 between  $c=0.93$  and the four other contrasts (one-way ANOVA,  $F_{4, 134}=8.7$ ,  $p<0.0001$ ,  
219 followed by Fisher LSD post hoc,  $0.0001<p<0.012$ ) and between  $c=0.27$  and  $c=0.71$   
220 ( $p=0.015$ ). In the case of the oblique stripes only the three highest contrasts could be  
221 tested, since  $n=1$  for  $c=0.17$  and  $0.27$ . Still, the avoidances were performed  
222 significantly farther away from the wall at  $c=0.93$  than at  $c=0.39$  and  $0.71$  (one-way  
223 ANOVA,  $F_{2, 125}=26.8$ ,  $p<0.0001$ , followed by Fisher LSD post hoc,  $p<0.001$ ). With  
224 the horizontal stripes and  $c=0.93$  the avoidances were performed 4.6 cm from the wall  
225 and this was farther away than with the four other contrasts (one-way ANOVA,  $F_{4,}$   
226  $_{81}=8.5$ ,  $p<0.0001$ , followed by Fisher LSD post hoc,  $0.0004<p<0.023$ ). The width of  
227 the stripes at the distance of avoidance was turned into visual angle on the retina and  
228 the average of these angles varied from  $52^\circ$  (horizontal,  $c=0.17$ ) to  $25^\circ$  (oblique,  $c =$   
229  $0.93$ ) (fig. 6b, table 1). This transformation of the data had no significant effect on the  
230 statistics. The smallest visual angle provoking an avoidance response was  $15^\circ$ .

231

### 232 Intensity experiments

233 When presenting the medusae with uniformly grey tank walls the obstacle avoidance  
234 behaviour was almost completely abolished even with the darkest grey tone matching  
235 the mean intensity of the white and the darkest (black) stripe. For all five grey tones  
236 they swam with few turns and stayed most of the time in the periphery of the tank  
237 often touching the wall (fig. 4). This resulted in them having the same average  
238 distance to the tank wall, 2.5 – 2.9 cm (one-way ANOVA,  $F_{4, 35}=0.63$ ,  $p=0.64$ ) (fig.

239 5a). Further, at the three highest intensities (matching  $c = 0.17, 0.27$  and  $0.39$ ) no  
240 avoidances were seen and only very few with the two darker walls ( $0.05$  avoidances  
241 per min in both cases). This slight increase with darker walls was not significant (one-  
242 way ANOVA,  $F_{4, 35}=0.75, p=0.57$ ).

243

#### 244 Orientation experiments

245 When comparing the response to stripes with the same contrast but different  
246 orientation and the corresponding grey tone interesting differences are seen. With the  
247 two lowest contrasts all four different experimental conditions resulted in the same  
248 general distance to the wall (fig. 5a) (one-way ANOVA,  $p=0.052$  and  $0.36$   
249 respectively). At  $c=0.39$  only the vertical stripes kept the medusae farther away than  
250 the corresponding grey tone (one-way ANOVA,  $F_{3,32}=4.03, p=0.014$ ). When taking  
251 one step further up in contrast the vertical and oblique stripes gave similar results and  
252 both significantly higher than the horizontal stripes and grey tone (one-way ANOVA,  
253  $0.00044 < p < 0.0052$ ). With the highest contrast ( $c=0.93$ ) the three different stripes  
254 caused the medusae to keep the same distance to the wall,  $5.7 - 5.9$  cm,  
255 ( $0.75 < p < 0.99$ ), which in all cases were significantly farther away than the  
256 corresponding grey tone (one-way ANOVA,  $F_{3, 32}=37.4, p < 0.0001, p < 0.0001$ ).

257 A similar picture is seen with the rate of avoidances (fig. 5b). Here the vertical  
258 stripes produced a stronger response than the three other visual scenes already at  
259  $c=0.27$  (one-way ANOVA,  $F_{3, 32}=5.5, 0.005 < p < 0.03$ ). At  $c=0.71$  both the vertical and  
260 oblique stripes caused more avoidances than the grey tone (one-way ANOVA,  $F_{3,}$   
261  $_{32}=9.5, 0.0007 < p < 0.001$ ) and the vertical more avoidances than the horizontal stripes  
262 ( $p=0.038$ ). With the highest contrast all stripes gave similar responses all significantly

263 higher than the corresponding grey tone (one-way ANOVA,  $F_{3, 32}=16.8$ ,  
264  $0.0001 < p < 0.0004$ ) (fig. 5b).

265           When considering the average distance of the avoidances and the average  
266 visual angles there were no significant differences between the four experimental  
267 conditions at any of the contrasts (fig. 6).

268

#### 269 Contrast in the natural habitat

270 A relative measure of contrast between the prop roots and the surrounding water as a  
271 function of distance was obtained from an underwater photo (fig. 7a). Four roots in  
272 the picture were analyzed with root 1 being the closest and root 4 the furthest away. In  
273 the picture adjusted to the spectral sensitivity of *T. cystophora* (fig. 7b) there was a  
274 correlation between relative distance and relative contrast. Root 1 had a contrast of  
275 0.39, for root 2 and 3 it was 0.24 and the most distant root 4 had a relative contrast of  
276 0.15.

277

#### 278 **Discussion**

279 The results presented here clearly demonstrate that the visually guided obstacle  
280 avoidance described for cubomedusae (Garm et al., 2007b) is dependant on actual  
281 detection of the obstacle using spatial information and not a mere positive phototaxis.

282 When we presented medusae of *Tripedalia cystophora* with a visual scene without  
283 spatial information the behaviour disappeared even though the overall brightness of  
284 the wall equaled that of a scene with stripes resulting in many avoidances. We also  
285 show that for all three orientations of the stripes an increasing contrast made the  
286 medusae stay farther away from the wall and perform more avoidances. Finally we  
287 found that the orientation of the obstacle influences the strength of the response, with

288 vertical stripes causing the strongest response followed by the oblique with an  
289 intermediate effect and lastly the horizontal stripes resulting in the weakest response.

290

291 Contrast dependent obstacle avoidance

292 Our experiments returned a surprising result. We expected the obstacle avoidance  
293 response to have a contrast threshold triggering the behaviour. That is, once a certain  
294 contrast is present on the retina the medusa would acknowledge the presence of the  
295 obstacle and start the response. The results strongly indicate that this is not the case,  
296 since there is a gradual change of the response strength (measured as average distance  
297 to wall, rate of avoidances and object size on retina) more or less proportional with  
298 the change in contrast, at least for the vertical stripes. This could be because a higher  
299 contrast means greater certainty that there is an obstacle and thus a greater  
300 “willingness” to respond, but there is another possible explanation and the two are not  
301 mutually exclusive.

302         It would be of great advantage for the medusae if they were able to tell the  
303 distance to the obstacle and not start the avoidance response until within a certain  
304 distance. This would ensure that they do not perform unnecessary responses  
305 interfering with their foraging behaviour in the light shafts between the roots (Stewart,  
306 1996; Buskey, 2003). There are several ways to visually determine the distance to an  
307 object. The most exact are also the most advanced using parameters such as depth of  
308 focus, relative movements and relative size combined with knowledge of absolute size  
309 (Land and Nilsson, 2012). These are all mechanisms demanding acute vision and  
310 much neural processing, which are resources not available to the jellyfish. But there  
311 are also more simple ways to estimate the distance to an object in the visual scene.  
312 The medusa can take advantage of the water in the mangrove swamp being turbid

313 with visibilities often down to about a meter (Garm et al., 2011). This means that due  
314 to light absorption and scattering the contrast of a given object decreases steeply with  
315 distance and that contrast, therefore, can be used as a semi reliable measure of  
316 distance. This is supported by the underwater photo of the prop roots, which are the  
317 naturally occurring obstacles (fig. 7). Even in this habitat with complex light  
318 distribution there is still an overall decrease in contrast between the roots and the  
319 surrounding water with distance. This taken together with our behavioural results  
320 show that the obstacle avoidance response has a built in mechanism for distance  
321 detection probably enabling effective foraging between the roots while still avoiding  
322 collisions. To our knowledge these are the first behavioural data pointing to the use of  
323 this mechanism for distance evaluation in any aquatic animal.

324

#### 325 Pattern dependent obstacle avoidance

326 Interestingly, the contrast dependency varied with the orientation of the stripes. At the  
327 highest contrast,  $c=0.93$ , there was no difference between vertical, oblique and  
328 horizontal stripes, but differences were seen in the general distance to the wall and the  
329 rate of avoidances at lower contrasts. The medusae responded the strongest to the  
330 vertical stripes and already at  $c=0.27$  this scene provoked more avoidances than any  
331 of the other visual scenes. At  $c=0.71$  both the vertical stripes and the oblique stripes  
332 made the medusae stay farther away from the wall than the horizontal stripes and the  
333 grey tone. Finally, the response to the horizontal stripes did not differ from the grey  
334 tones until we used the highest contrast. This shows that the more vertical an obstacle  
335 (or contrast line), the stronger the medusae will react to it and this is in good  
336 concordance with the most often encountered obstacles, the prop roots. As seen in  
337 figure 7 the roots typically have an orientation varying between  $45^\circ$  oblique and

338 vertical. Almost no horizontal lines are seen in the natural habitat. This is a good  
339 example of a matched filter (Wehner, 1987), where the visual system is matched to  
340 the natural visual scene.

341         There are two ways orientation filters can be implemented in the visual system  
342 of *T. cystophora*. Either, all contrast lines are detected equally by the eye independent  
343 of orientation and then some contrast line orientations are filtered away by the CNS.  
344 The other possibility is that the retina is better at detecting some orientations of  
345 contrast lines than others. The latter is favored by our behavioural data, since the  
346 medusae respond equally strong to all three orientations at the highest contrast,  
347 indicating that any high contrast object can trigger the response. The separation of the  
348 different orientation could then be accomplished by directional contrast enhancement,  
349 such that vertical contrast lines would be enhanced and horizontal not. Support for  
350 such enhancement through lateral inhibition is offered by the presence of synapses  
351 between neighboring photoreceptors in the lens eyes (Gray et al., 2009). It would  
352 require that the synapses specifically inhibit horizontal neighbors, though, and  
353 whether this is the case is not known.

354

#### 355 Image processing with limited brainpower

356 The obstacle avoidance behaviour is probably controlled by the lower lens eyes  
357 (Garm et al., 2007b). From our earlier morphological and optical modeling of *T.*  
358 *cystophora* we know that both the upper and lower lens eye allow for spatial  
359 resolution (Nilsson et al., 2005). The slit eyes might also acquire spatial information  
360 but in the vertical plane only (Garm et al., 2008). In the case of the upper lens eyes it  
361 was shown that the animals do indeed use the spatial information when they navigate  
362 from the mangrove lagoon to their habitat between the prop roots (Garm et al., 2011).

363 With the present work we have now shown that *T. cystophora* also requires spatial  
364 resolution in order to avoid obstacles. The data again point to the lower lens eyes  
365 controlling the behaviour. The upper lens eyes and the pit eyes point upwards  
366 observing Snell's window (Garm et al., 2011) and do not see the underwater roots.  
367 The only other eyes observing the underwater world are the slit eyes but they should  
368 preferably detect horizontal lines. Further, the minimum size of the obstacle on the  
369 retina able to evoke a response ( $15^\circ$ ) nicely matches the calculated resolution of the  
370 lower lens eye varying between  $10^\circ$  and  $20^\circ$  depending on the area of the retina  
371 (Nilsson et al., 2005). The possible image formation in the slit eyes, seeing the world  
372 in horizontal bands, is intriguing and still awaits proof from behavioural experiments.

373 Cnidarians are often accused of being brainless (Wehner, 2005), but there is  
374 no doubt that at least hydromedusae and cubomedusae possess a central nervous  
375 system (Passano, 1976; Mackie, 2004; Skogh et al., 2006; Garm et al., 2007c). In  
376 cubomedusae the CNS is composed of four parallel rhopalial nervous systems (RNS)  
377 interconnected by a ring nerve (Satterlie, 2002; Garm et al., 2007c; Satterlie, 2011).  
378 From electrophysiological experiments and morphological examinations it is  
379 indicated that the visual processing mostly takes place in the RNS (Satterlie and  
380 Nolen, 2001; Parkefelt et al., 2005; Garm and Mori, 2009; Parkefelt and Ekström,  
381 2009). In the adult medusa only about 1000 neurons are found here besides the  
382 photoreceptors (Skogh et al., 2006). This limited number of neurons has to process  
383 spatial information from at least the two lens eyes and possibly also the slit eyes.  
384 Considering the amount of neuronal power often dedicated to visual processing  
385 (Thorpe et al., 1996; Masland, 2012) this is somewhat surprising. Such a system  
386 stresses the need for the above mentioned matched filters, which ensures that  
387 irrelevant information is removed and that only the essential information is processed



388 by the CNS. These filters are often applied already in the very periphery at the sensors  
389 (Barth, 2000) and the suggested lateral inhibition in the retina enhancing vertical  
390 stripes would be a clear example of this. In vision matched filters may result in so-  
391 called special purpose eyes (Land and Nilsson, 2006), where the animal has several  
392 eye types each specialized in taking up a narrow spectrum of information supporting  
393 one or a few behaviours only. The visual system of box jellyfish is a textbook  
394 example of special purpose eyes and this is probably one of the explanations for how  
395 they support an elaborate behavioural repertoire with their sparse CNS.

396

397

#### 398 **Acknowledgements**

399 The authors are pleased with the fruitful and constructive discussions in the Sensory  
400 Biology Group at University of Copenhagen and AG acknowledges the financial  
401 support from the VILLUM Foundation (grant# VKR022166).

402

403

404

#### Reference List

405

406 **Barth, F. G. (2000).** How to catch the wind: spider hairs specialized for sensing the  
407 movement of air. *Natur Wissenschaften* **87**, 51-58.

408 **Berger, E. W. (1898).** The histological structure of the eyes of cubomedusae. *J Comp*  
409 *Neurol* **8**, 223-230.

410 **Buskey, E. J. (2003).** Behavioral adaptations of the cubozoan medusa *Tripedalia*  
411 *cystophora* for feeding on copepod (*Dioithona oculata*) swarms. *Mar Biol*  
412 **142**, 225-232.

- 413 **Claus, C. (1878).** Ueber *Charybdea marsupialis*. *Arbeiten aus dem zoologischen*  
414 *Institut Universität Wien* **1**, 1-56.
- 415 **Coates, M. M., Garm, A., Theobald, J. C., Thompson, S. H., and Nilsson, D. E.**  
416 **(2006).** The spectral sensitivity in the lens eyes of a box jellyfish, *Tripedalia*  
417 *cystophora*. *J Exp Biol* **209**, 3758-3765.
- 418 **Garm, A., Anderson, F., and Nilsson, D. E. (2008).** Unique structure and optics of  
419 the lesser eyes of the box jellyfish *Tripedalia cystophora*. *Vision Res* **48**, 1061-  
420 1073.
- 421 **Garm, A., Bielecki, J., Petie, R., and Nilsson, D. E. (2012).** Oposite patterns of  
422 diurnal rhythms in the box jellyfish *Tripedalia cystophora* and *Carybdea*  
423 *sivickisi*. *Biol Bull* **222**, 35-45.
- 424 **Garm, A., Coates, M. M., Seymour, J., Gad, R., and Nilsson, D. E. (2007a).** The  
425 lens eyes of the box jellyfish *Tripedalia cystophora* and *Chiropsalmus sp.* are  
426 slow and color-blind. *J Comp Physiol A* **193**, 547-557.
- 427 **Garm, A. and Ekström, P. (2010).** Evidence for multiple photosystems in jellyfish.  
428 *International Review of Cell and Molecular Biology* **280**, 41-78.
- 429 **Garm, A. and Mori, S. (2009).** Multiple photoreceptor systems control the swim  
430 pacemaker activity in box jellyfish. *J Exp Biol* **212**, 3951-3960.
- 431 **Garm, A., O'Connor, M., Parkefelt, L., and Nilsson, D. E. (2007b).** Visually  
432 guided obstacle avoidance in the box jellyfish *Tripedalia cystophora* and  
433 *Chiropsella bronzie*. *J Exp Biol* **210**, 3616-3623.

- 434 **Garm, A., Oskarsson, M., and Nilsson, D. E. (2011).** Box jellyfish use terrestrial  
435 visual cues for navigation. *Curr Biol* **21**, 798-803.
- 436 **Garm, A., Poussart, Y., Parkefeld, L., and Nilsson, D. E. (2007c).** The ring nerve of  
437 the box jellyfish *Tripedalia cystophora*. *Cell Tissue Res* **329**, 147-157.
- 438 **Govardovskii, V. I., Fyhrquist, N., Reuter, T., Kuzmin, D. G., and Donner, K.**  
439 **(2000).** In search of the visual pigment template. *Visual Neurosci* **17**, 509-528.
- 440 **Gray, G. C., Martin, V. J., and Satterlie, R. A. (2009).** Ultrastructure of the retinal  
441 synapses in cubozoans. *Biol Bull* **217**, 35-49.
- 442 **Hertwig, O. and Hertwig, R. (1878).** Das Nervensystem und die Sinnesorgane der  
443 Medusen. Leipzig: Vogel. pp. 1-186
- 444 **Land, M. F. and Nilsson, D. E. (2006).** General-purpose and special-purpose visual  
445 systems. In: *Invertebrate vision* (eds. Warrant, E. J. and Nilsson, D. E.), pp.  
446 167-210. Cambridge: Cambridge University Press.
- 447 **Land, M. F. and Nilsson, D. E. (2012).** Animal eyes. Oxford: Oxford University  
448 Press. pp. 1-221
- 449 **Mackie, G. O. (2004).** Central neural circuitry in the jellyfish *Aglantha*: A model  
450 "simple nervous system". *Neuro-Signals* **13**, 5-19.
- 451 **Martin, V. J. (2004).** Photoreceptors of cubozoan jellyfish. *Hydrobiol* **530/531**, 135-  
452 144.
- 453 **Masland, R. H. (2012).** The neuronal organization of the retina. *Neuron* **76**, 266-280.

- 454 **Nilsson, D. E., Gislén, L., Coates, M. M., Skogh, C., and Garm, A. (2005).**  
455       Advanced optics in a jellyfish eye. *Nature* **435**, 201-205.
- 456 **Parkefelt, L. and Ekström, P. (2009).** Prominent system of RFamide  
457       immunoreactive neurons in the rhopalia of box jellyfish (Cnidaria: Cubozoa).  
458       *J Comp Neurol* **516**, 157-165.
- 459 **Parkefelt, L., Nilsson, D. E., and Ekström, P. (2005).** A bilaterally symmetric  
460       nervous system in the rhopalia of a radially symmetric cubomedusa. *J Comp*  
461       *Neurol* **492**, 251-262.
- 462 **Passano, L. M. (1976).** Strategies for the study of the coelenterate brain. In:  
463       *Coelenterate Ecology and Behavior* (ed. Mackie, G. O.), pp. 639-645. London  
464       and New York: Plenum Press.
- 465 **Satterlie, R. A. (2002).** Neural control of swimming in jellyfish: a comparative story.  
466       *Can J Zool* **80**, 1654-1669.
- 467 **Satterlie, R. A. (2011).** Do jellyfish have central nervous systems? *J Exp Biol* **214**,  
468       1215-1223.
- 469 **Satterlie, R. A. and Nolen, T. G. (2001).** Why do cubomedusae have only four swim  
470       pacemakers? *J Exp Biol* **204**, 1413-1419.
- 471 **Skogh, C., Garm, A., Nilsson, D. E., and Ekström, P. (2006).** The bilateral  
472       symmetric rhopalial nervous system of box jellyfish. *J Morphol* **267**, 1391-  
473       1405.
- 474 **Stewart, S. E. (1996).** Field behavior of *Tripedalia cystophora* (class Cubozoa). *Mar*  
475       *Freshw Behav Physiol* **27**, 175-188.

- 476 **Thorpe, S., Fize, D., and Marlot, C. (1996).** Speed of processing in human vision.  
477 *Nature* **381**, 520-522.
- 478 **Wehner, R. (1987).** Matched filters neural models of the external world. *J Comp*  
479 *Physiol A* **161**, 511-532.
- 480 **Wehner, R. (2005).** Brainless eyes. *Nature* **435**, 157-158.
- 481 **Werner, B. (1975).** Bau und lebensgeschichte des polypen von *Tripedalia cystophora*  
482 (Cubozoa, class. nov., Carybdeidae) und seine bedeutung für die evolution der  
483 Cnidaria. *Helgoländer Wiss Meeresuntersuch* **27**, 461-504.
- 484 **Yamasu, T. and Yoshida, M. (1976).** Fine structure of complex ocelli of a  
485 cubomedusan, *Tamoya bursaria* Haeckel. *Cell Tissue Res* **170**, 325-339.  
486  
487

488 **Figure legends**

489

490 **Figure 1**

491 Examples of swim trajectories from the experiments with vertical stripes. The data are  
492 from the same medusa presented with all five different contrast settings. Each  
493 trajectory represents 2.5 min with a time resolution of 1 s. At the low contrast end ( $c =$   
494  $0.17$  and  $0.27$ ) there is little response from the medusa, which performs few turns and  
495 has several contacts with the wall of the tank. As contrast increases the medusa starts  
496 responding stronger and stronger and at  $c = 0.93$  it makes many obstacle avoidances  
497 and stays close to the center of the tank during the entire 2.5 min of the experiment.  
498 The numbers on the axes indicate the distance to the wall in cm.

499

500 **Figure 2**

501 Examples of swim trajectories from the experiments with oblique stripes. The data are  
502 from the same medusa presented with all five different contrast settings. Each  
503 trajectory represents 2.5 min with a time resolution of 1 s. At the low contrast end ( $c =$   
504  $0.17 - 0.39$ ) there is little response from the medusa, which performs few turns and  
505 often comes close to the wall of the tank. At  $c = 0.71$  and  $0.93$  it makes many obstacle  
506 avoidances and stays close to the center of the tank during the entire 2.5 min of the  
507 experiment. The numbers on the axes indicate the distance to the wall in cm.

508

509 **Figure 3**

510 Examples of swim trajectories from the experiments with horizontal stripes. The data  
511 are from the same medusa presented with all five different contrast settings. Each  
512 trajectory represents 2.5 min with a time resolution of 1 s. The medusa does not seem

513 to respond to the stripes until presented with the highest contrast,  $c=0.93$  (compare  
514 with figure 1). The numbers on the axes indicate the distance to the wall in cm.

515

516 Figure 4

517 Examples of swim trajectories from the intensity experiments. The data are from the  
518 same medusa presented with all five different intensity settings. Each trajectory  
519 represents 2.5 min with a time resolution of 1 s. When the wall is uniformly grey the  
520 medusa fails to respond to the increasing darkness and makes almost no obstacle  
521 avoidances even when presented with the darkest wall matching in light intensity the  
522 average between the white and the darkest stripes (compare with figure 1). The  
523 numbers on the axes indicate the distance to the wall in cm.

524

525 Figure 5

526 Spatial information and contrast triggers obstacle avoidance. The bars indicate the  
527 average and the error bars the standard error of mean ( $n=8$  for vertical stripes and grey  
528 tones,  $n=10$  for oblique and horizontal stripes). **(A)** In the contrast experiments with  
529 the striped wall the medusae respond to darker stripes by keeping a longer distance to  
530 the wall. **(B)** With the stripes the medusae also respond to increasing contrast with an  
531 increasing number of avoidances. In the intensity experiments with the grey tones  
532 almost no avoidances were seen. The pattern of the bars follows the orientation of the  
533 stripes in the experiments. Lines above bars indicate significant differences at the 0.05  
534 (\*) or 0.01 (\*\*) level, see Results section for statistics.

535

536 Figure 6

537 Distance when avoiding obstacles. The bars indicate the average and the error bars the  
538 standard error of mean (n is indicated by number in bars). **(A)** The more avoidances  
539 produced by increasing contrast are also performed farther away from the wall. There  
540 was no significant difference between the three different orientations of the stripes  
541 when tested with the same contrast. **(B)** When turning the distance of avoidance into  
542 angular size of the stripes it is seen that, independent of orientation, at the highest  
543 contrast they take up about 25 degrees on the retina. The pattern of the bars follows  
544 the orientation of the stripes in the experiments. See Results section for statistics.

545

546 Figure 7

547 Relative contrasts in the natural habitat. **(A)** Photo from the natural habitat of *T.*  
548 *cystophora* showing the natural obstacles, the prop roots. The relative distance from  
549 the camera to the root was determined for four roots by their intersection with the  
550 surface (coloured lines). The higher up in the picture the intersection the closer the  
551 root is to the camera. **(B)** The RGB photo has the red channel removed and is turned  
552 into grayscale to match the spectral sensitivity of the lens eyes of *T. cystophora*. The  
553 relative contrast (coloured number) was calculated from the pixel values in two boxes  
554 of 500 pixel each (coloured boxes). One box of pixels from the edge of the root and  
555 one box from the water just next to it. The farther away the root the lower the contrast  
556 (picture courtesy Dan-E Nilsson).



Figure 1

Vertical

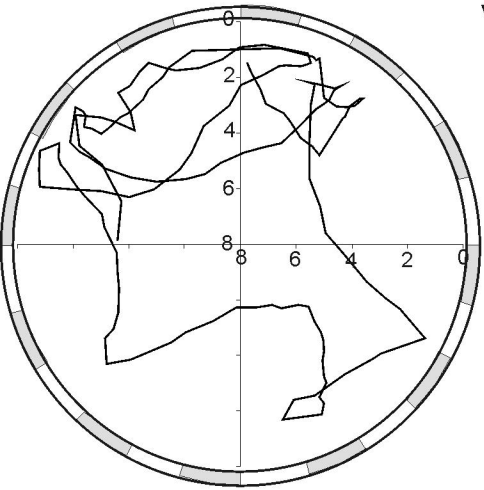

Contrast = 0.17

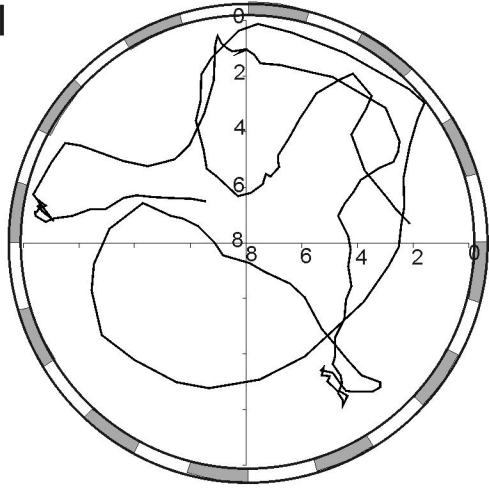

Contrast = 0.27

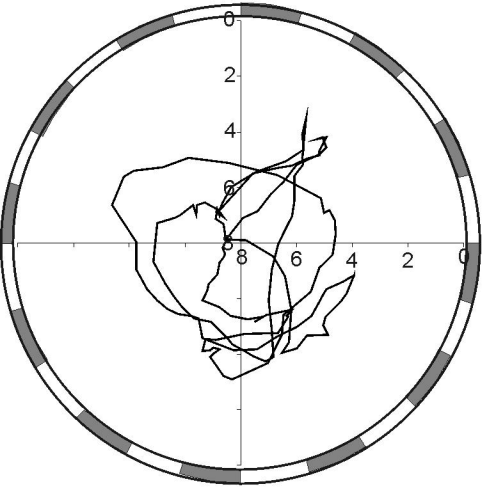

Contrast = 0.39

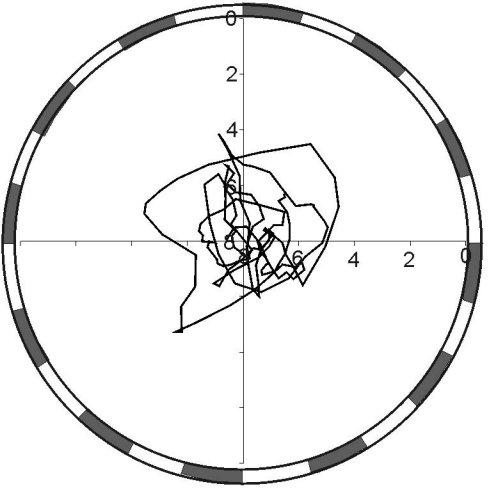

Contrast = 0.71

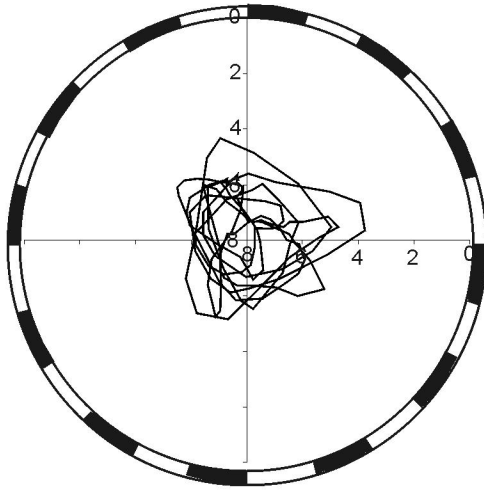

Contrast = 0.93

Figure 2

Oblique

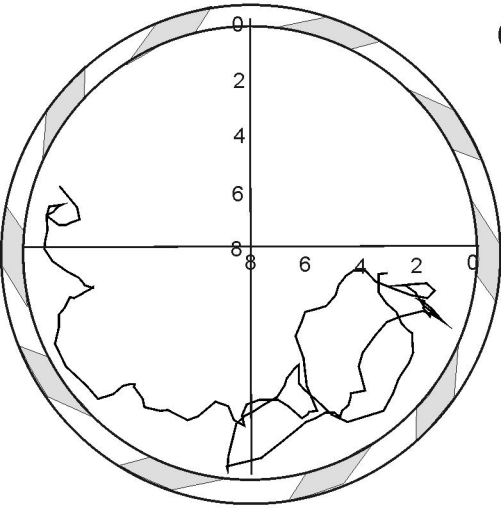

Contrast = 0.17

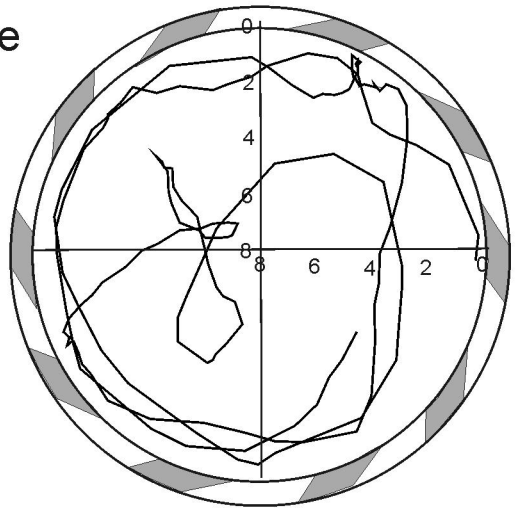

Contrast = 0.27

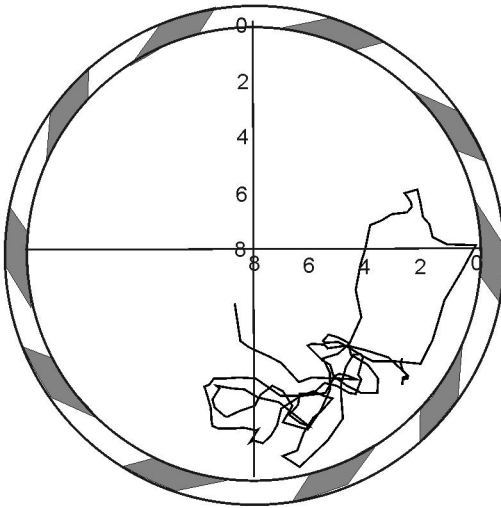

Contrast = 0.39

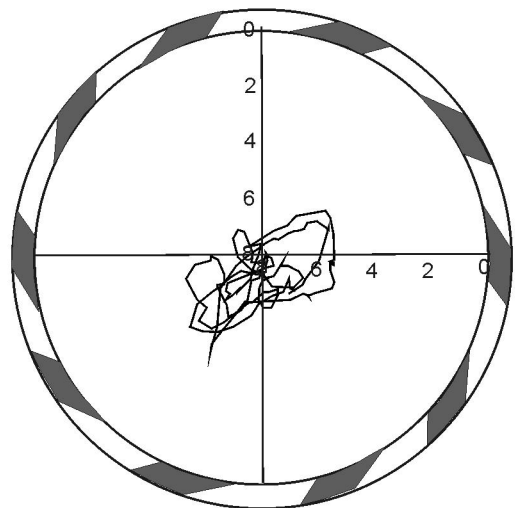

Contrast = 0.71

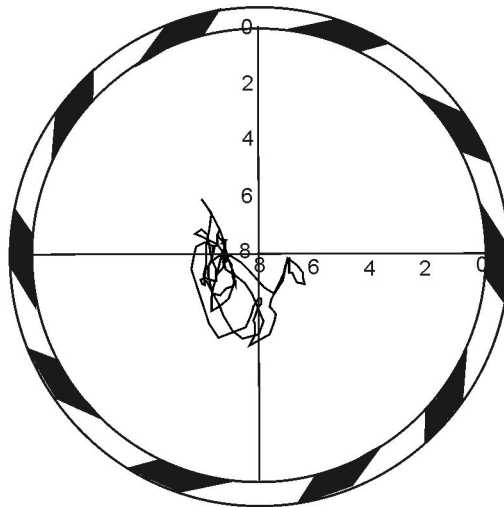

Contrast = 0.93

Figure 3

Horizontal

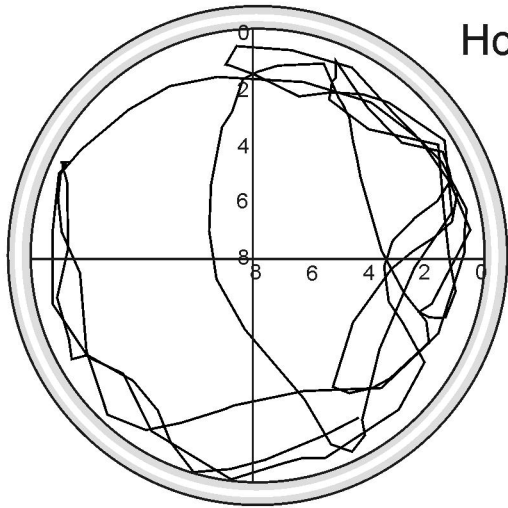

Contrast = 0.17

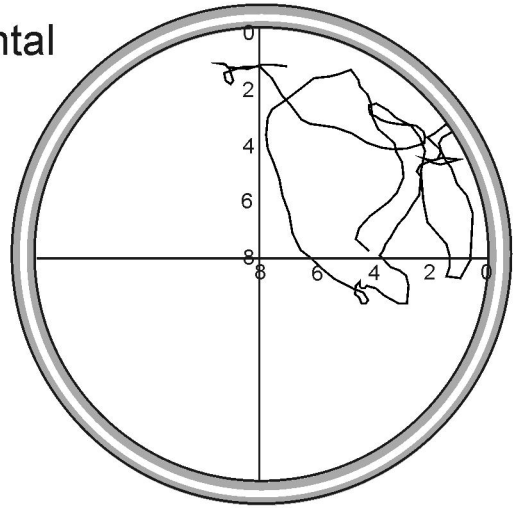

Contrast = 0.27

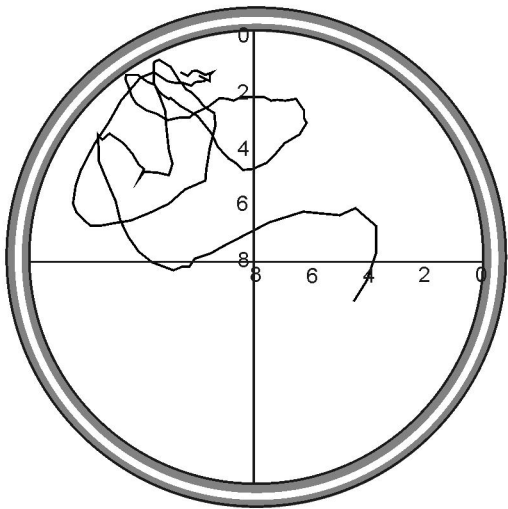

Contrast = 0.39

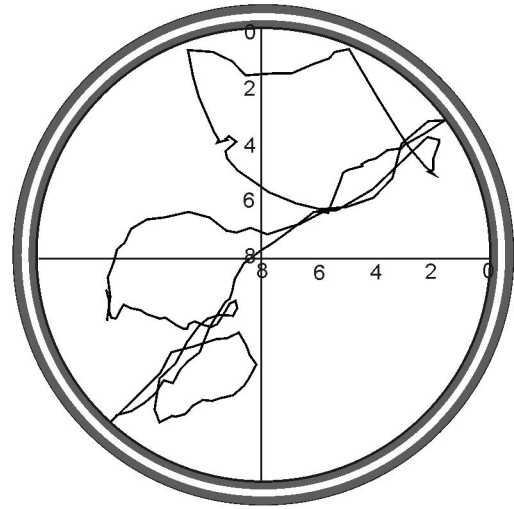

Contrast = 0.71

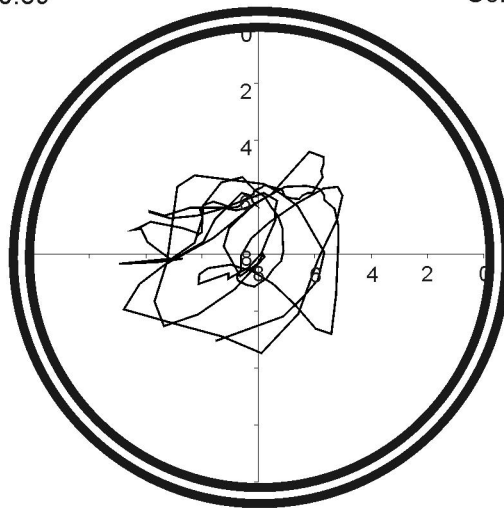

Contrast = 0.93

Figure 4

Grey tone

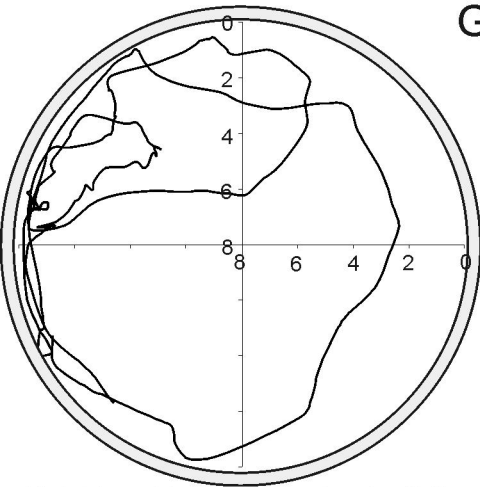

Matching stripes with contrast = 0.17

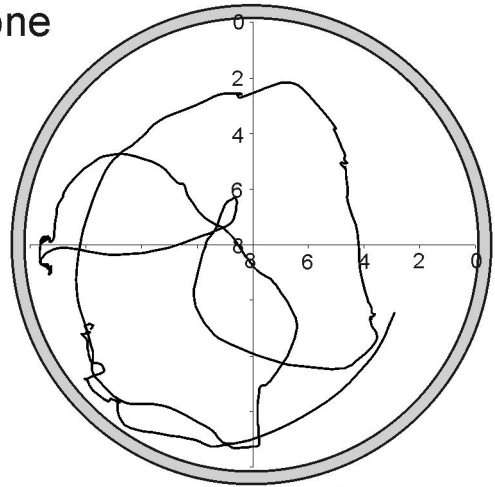

Matching stripes with contrast = 0.27

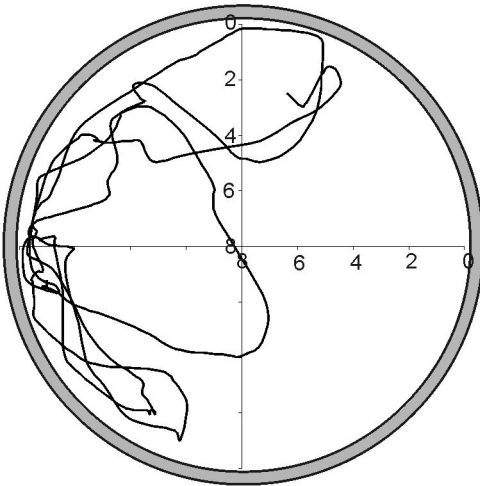

Matching stripes with contrast = 0.39

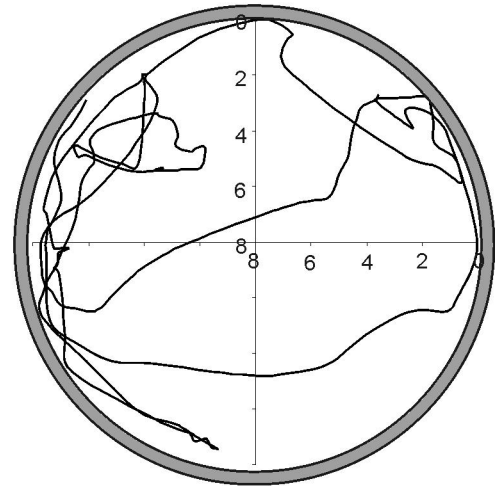

Matching stripes with contrast = 0.71

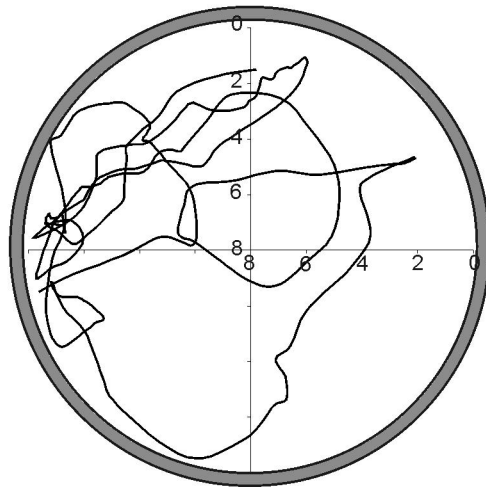

Matching stripes with contrast = 0.93

Figure 5

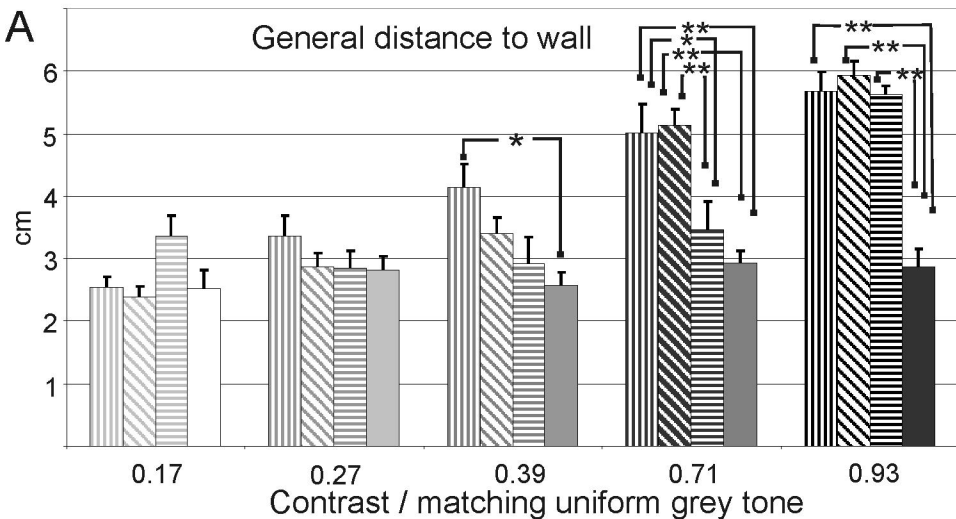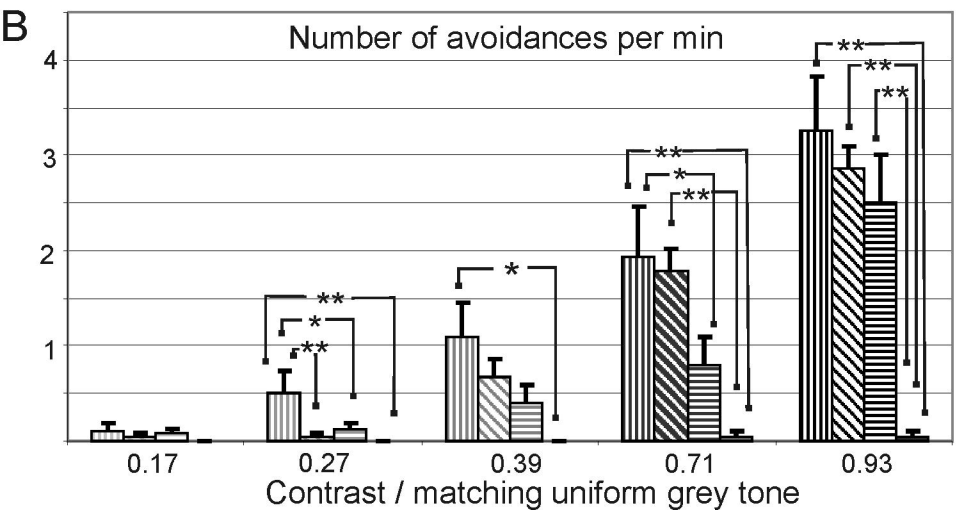

Figure 6

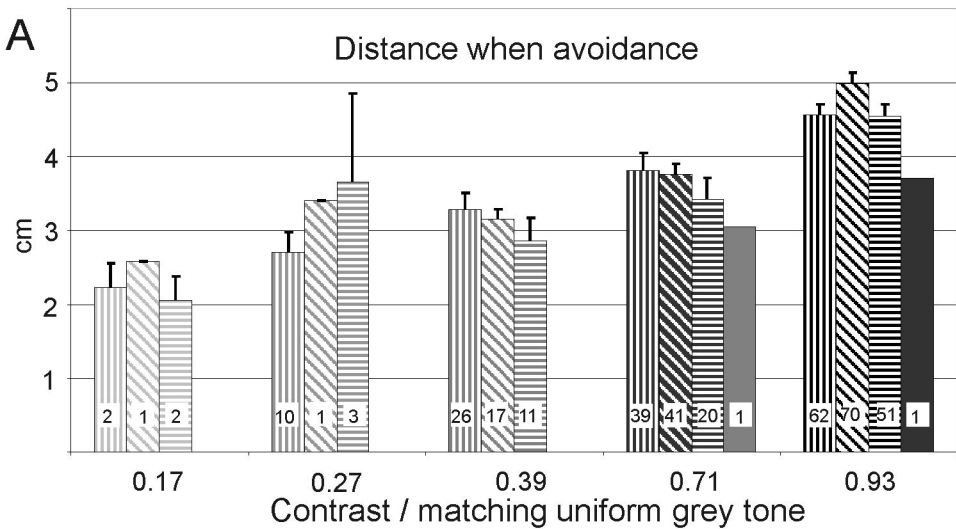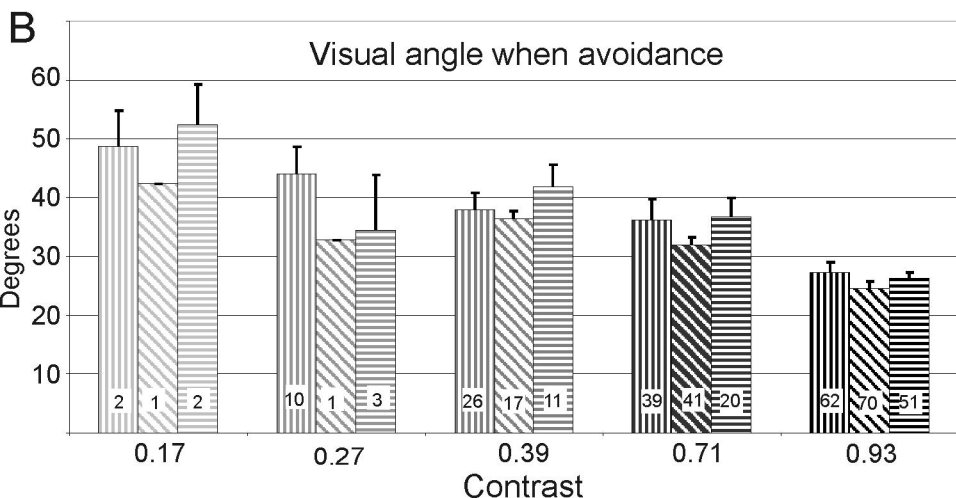

Figure 7

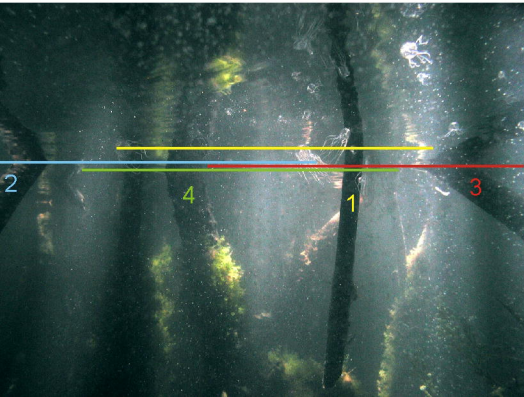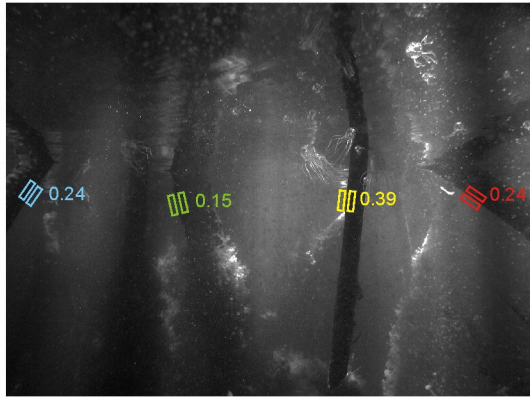

Table 1, summary of behavioural data

|            | Contrast        | General distance to wall in cm | Number of avoids per min | Distance to wall when avoid in cm | Visual angle of stripes when avoid |
|------------|-----------------|--------------------------------|--------------------------|-----------------------------------|------------------------------------|
| Vertical   | c=0.17          | 2.5 ± 0.5                      | 0.1 ± 0.1                | 2.2 ± 0.3                         | 49 ± 6                             |
|            | c=0.27          | 3.4 ± 0.9                      | 0.5 ± 0.2                | 2.7 ± 0.3                         | 44 ± 5                             |
|            | c=0.39          | 4.1 ± 1.0                      | 1.1 ± 0.4                | 3.3 ± 0.2                         | 38 ± 3                             |
|            | c=0.71          | 5.0 ± 1.2                      | 1.9 ± 0.5                | 3.8 ± 0.2                         | 36 ± 4                             |
|            | c=0.93          | 5.7 ± 0.8                      | 3.3 ± 0.6                | 4.6 ± 0.2                         | 27 ± 2                             |
| Oblique    | c=0.17          | 2.4 ± 0.2                      | 0.04 ± 0.04              | 2.6                               | 42                                 |
|            | c=0.27          | 2.9 ± 0.2                      | 0.04 ± 0.04              | 3.4                               | 33                                 |
|            | c=0.39          | 3.4 ± 0.3                      | 0.7 ± 0.2                | 3.1 ± 0.1                         | 36 ± 1                             |
|            | c=0.71          | 5.1 ± 0.3                      | 1.8 ± 0.2                | 3.8 ± 0.2                         | 32 ± 1                             |
|            | c=0.93          | 5.9 ± 0.2                      | 2.9 ± 0.2                | 5.0 ± 0.2                         | 25 ± 1                             |
| Horizontal | c=0.17          | 2.3 ± 0.2                      | 0.08 ± 0.06              | 2.1 ± 0.3                         | 52 ± 7                             |
|            | c=0.27          | 3.4 ± 0.3                      | 0.1 ± 0.06               | 3.6 ± 1.2                         | 34 ± 9                             |
|            | c=0.39          | 4.1 ± 0.4                      | 0.4 ± 0.2                | 2.9 ± 0.3                         | 42 ± 4                             |
|            | c=0.71          | 5.0 ± 0.5                      | 0.8 ± 0.3                | 3.4 ± 0.3                         | 37 ± 3                             |
|            | c=0.93          | 5.7 ± 0.3                      | 2.5 ± 0.5                | 4.6 ± 0.2                         | 26 ± 1                             |
| Grey tone  | matching c=0.17 | 2.5 ± 0.3                      | 0                        | n.a.                              | n.a.                               |
|            | matching c=0.27 | 2.8 ± 0.2                      | 0                        | n.a.                              | n.a.                               |
|            | matching c=0.39 | 2.6 ± 0.2                      | 0                        | n.a.                              | n.a.                               |
|            | matching c=0.71 | 2.9 ± 0.2                      | 0.05 ± 0.05              | 3.1                               | n.a.                               |
|            | matching c=0.93 | 2.9 ± 0.3                      | 0.05 ± 0.05              | 3.7                               | n.a.                               |

All values are mean ± s.e.m.
